# Supplementary material for: Controlled assembly of magnetic nanoparticles on microbubbles for multimodal imaging
Source: Royal Society of Chemistry journal article supplement (doi:10.1039/c5sm00864f), 2015-01-01
Supplement: c5sm00864f1.pdf [file c5sm00864f1.pdf]

Electronic Supplementary Information

## Controlled assembly of magnetic nanoparticles on microbubbles for multimodal imaging

Lei Duan,<sup>a,b</sup> Fang Yang,<sup>a</sup> Lina Song,<sup>a</sup> Kun Fang,<sup>a</sup> Jilai Tian,<sup>a</sup> Yijun Liang,<sup>a</sup> Mingxi Li,<sup>a</sup> Ning Xu,<sup>c</sup> Zhongda Chen,<sup>b</sup> Yu Zhang,<sup>a</sup> Ning Gu\*<sup>a</sup>

<sup>a</sup> State Key Laboratory of Bioelectronics, Jiangsu Key Laboratory for Biomaterials and Devices, School of Biological Science and Medical Engineering, Southeast University, Nanjing 210096, P.R. China.

<sup>b</sup> Department of Biomedical Engineering, Nanjing Medical University, 210029, P.R. China.

<sup>c</sup> Department of pathology, Nanjing Medical University, 210029, P.R. China.

It was found that as the amount of SPIO loaded was increased further (especially when the concentration was increased to a value greater than  $8.45 \times 10^{-7} \mu\text{g/MMB}$ ), the stability of the MMBs was affected (Figure S1.), resulting in the formation of agglomerates and deposits; these cannot be injected intravenously and thus have poor clinical applicability.

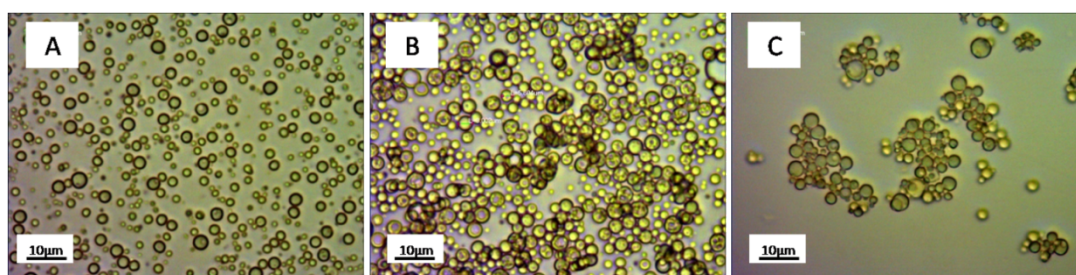

**Figure S1.** Optical microscopy images of MMBs coated different SPIO concentrations ( A:  $5.63 \times 10^{-7} \mu\text{g/MMB}$ , B:  $8.45 \times 10^{-7} \mu\text{g/MMB}$ , C:  $9.38 \times 10^{-7} \mu\text{g/MMB}$  ).
